# Supplementary material
Source: PubMed Central journal article supplement (PMC3074946)
Supplement: supp_00387.2010_legend.pdf [file supp_00387.2010_legend.pdf]

1 **Supplementary Data**

2

3 Figure legends

4

5 **Figure S1. Adipose tissue distribution and histology.** Chow-fed and long-term  
6 HFD-fed *neil1<sup>+/+</sup>* and *neil1<sup>-/-</sup>* animals were euthanized by CO<sub>2</sub> inhalation, and visceral  
7 (VAT) and sub-cutaneous (SAT) adipose tissues were excised and weighed (A). While  
8 HFD-feeding increased both VAT and SAT accumulation as anticipated, there were no  
9 differences in the pattern of fat deposition between *neil1<sup>+/+</sup>* and *neil1<sup>-/-</sup>* animals. VAT was  
10 also fixed in formalin and subsequently paraffin-embedded, sectioned, and stained with  
11 H&E (B). While HFD-feeding increased adipocyte size as expected, there were no  
12 marked differences in adipose tissue morphology between *neil1<sup>+/+</sup>* and *neil1<sup>-/-</sup>* animals.  
13 Tissue weights are represented as means  $\pm$  SEM of 5-7 animals, and histology data are  
14 representative of 5-7 animals per group. #, p<0.05 vs. Chow.
