# Supplementary material
Source: PubMed Central journal article supplement (PMC3074946)

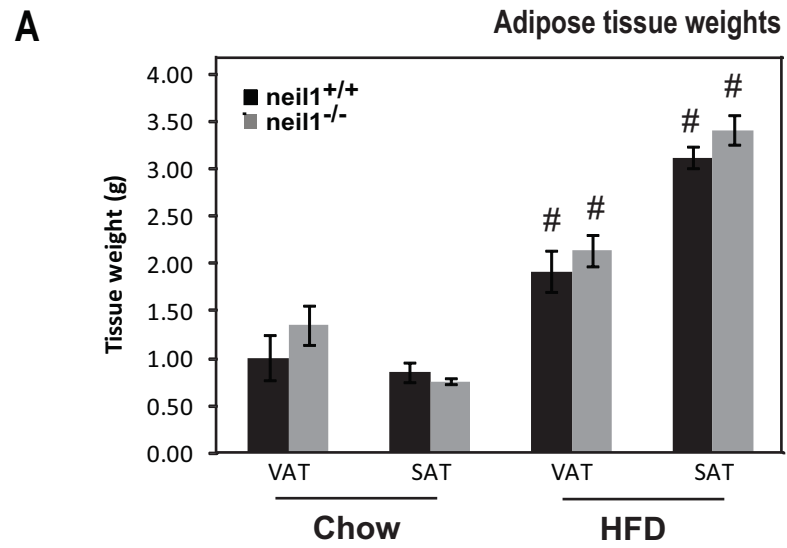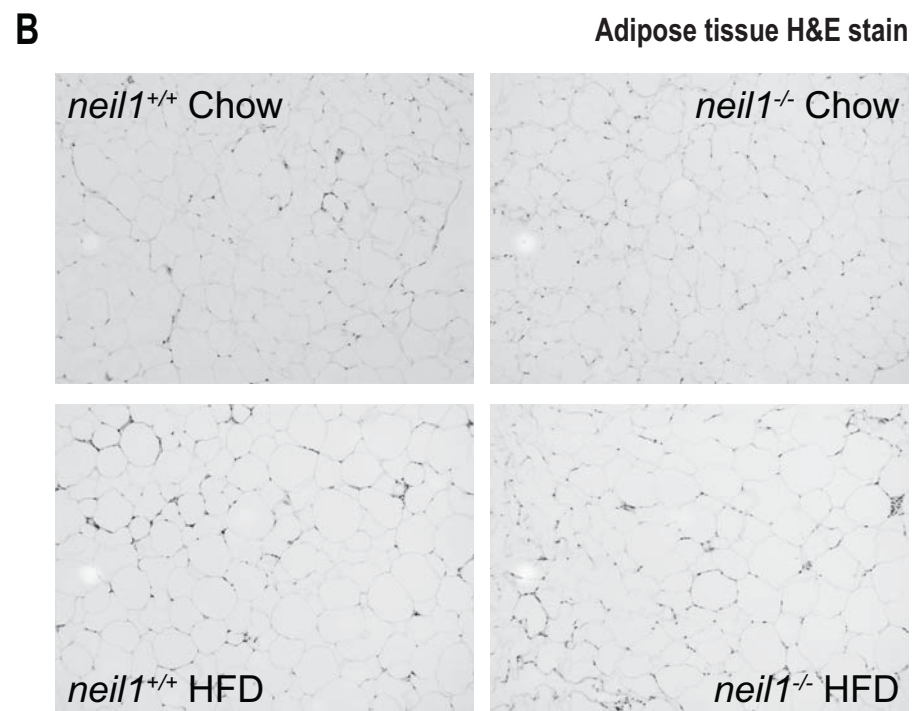

Supplement: supp_00387.2010_figS1.pdf [file supp_00387.2010_figS1.pdf]
